# Supplementary material for: Femto to millisecond observations of indole-based squaraine molecules photodynamics in solution
Source: Royal Society of Chemistry journal article supplement (doi:10.1039/c1cp22864a), 2011-12-14
Supplement: c1cp22864a.pdf [file c1cp22864a.pdf]

## Supporting Information

# Femto to millisecond observations of indole-based squaraines molecules photodynamics in solution

G. de Miguel<sup>1</sup>, M. J. Marchena<sup>1</sup>, M. Zitnan<sup>1</sup>, S. S. Pandey<sup>2</sup>, S. Hayase<sup>2</sup> and A. Douhal<sup>\*1</sup>

<sup>1</sup>*Departamento de Química Física, Facultad de Ciencias Ambientales y Bioquímica and Inamol, Universidad de Castilla-La Mancha, Avda. Carlos III, S.N., 45071 Toledo, Spain.*

<sup>2</sup>*Kyushu Institute of Technology, 2-4 Hibikino, Wakamatsu, Kitakyushu, Japan  
e-mail: [Abderrazzak.douhal@uclm.es](mailto:Abderrazzak.douhal@uclm.es)*

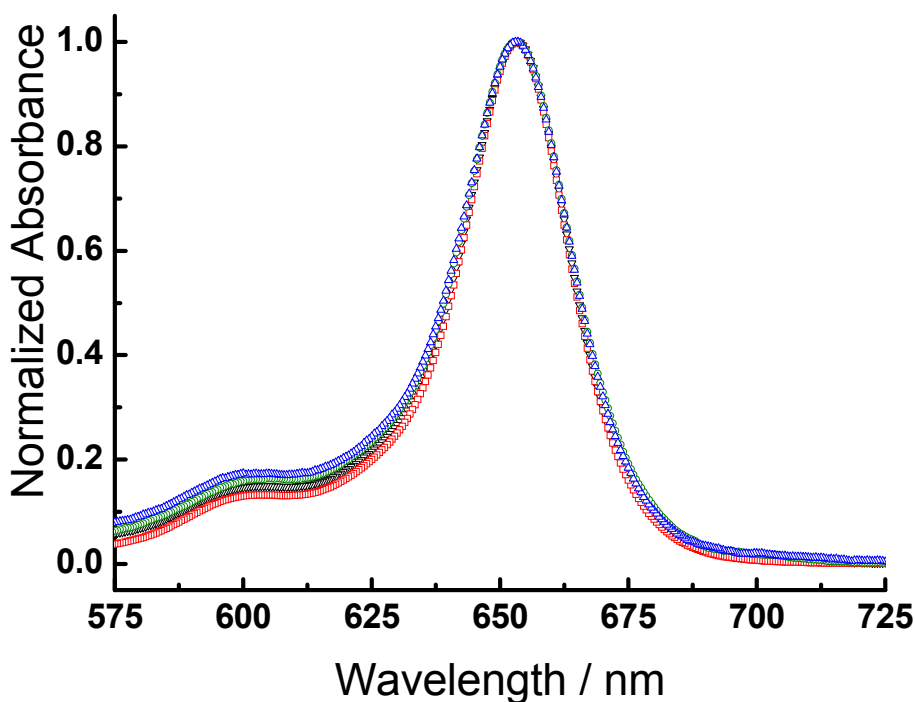

**Figure S1.** Normalized absorption spectra of SQ 4 in ACN at four different concentrations,  $10^{-5}$  (black triangles,  $\nabla$ ),  $10^{-6}$  (red squares,  $\square$ ),  $10^{-7}$  (green circles  $\circ$ ) and  $2 \times 10^{-8}$  M (blue triangles,  $\triangle$ ).

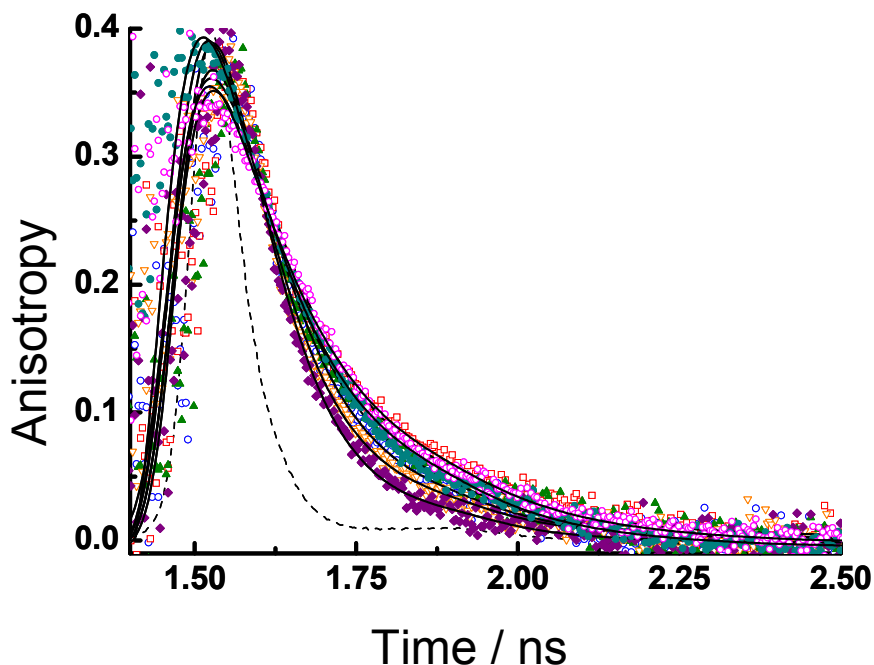

**Figure S2.** Anisotropy decays of SQ 2 (blue circles,  $\circ$ ), SQ 4 (red squares,  $\square$ ), SQ 26 (green triangles,  $\triangle$ ), SQ 41 (orange triangles,  $\nabla$ ), Me-SQ 41 (purple diamonds,  $\blacklozenge$ ), Me-SQ 26 (pink circles,  $\circ$ ) and 2Me-SQ 26 (green circles,  $\bullet$ ) in ACN solutions, monitored at 680 nm and excited at 635 nm. The solid curves are from the best fits of the experimental data.

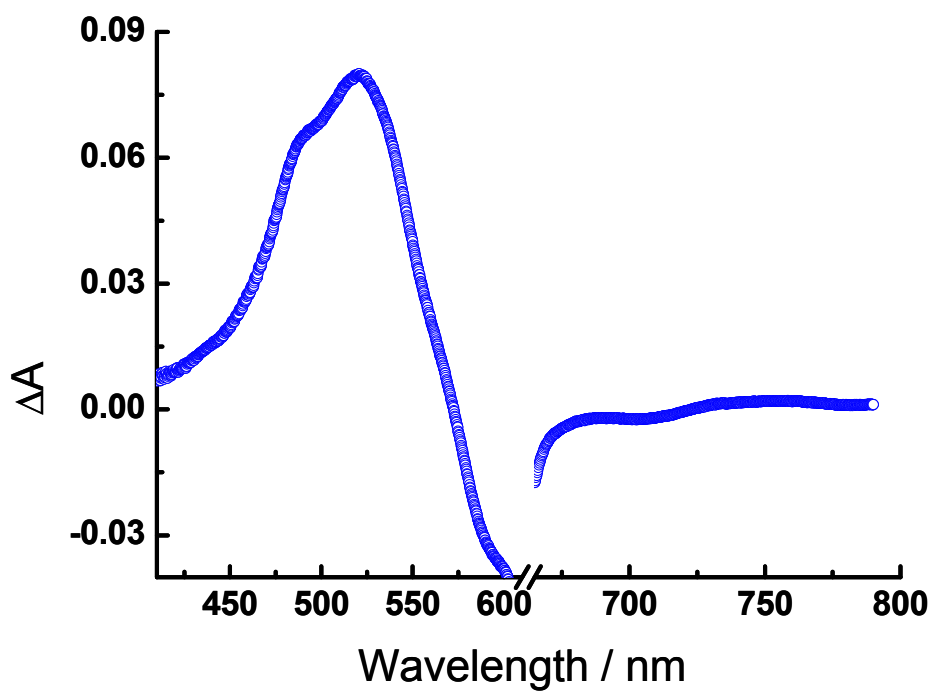

**Figure S3.** Normalized femtosecond transient absorption spectra of SQ 41 in ACN at 1 ps after excitation at 640 nm.

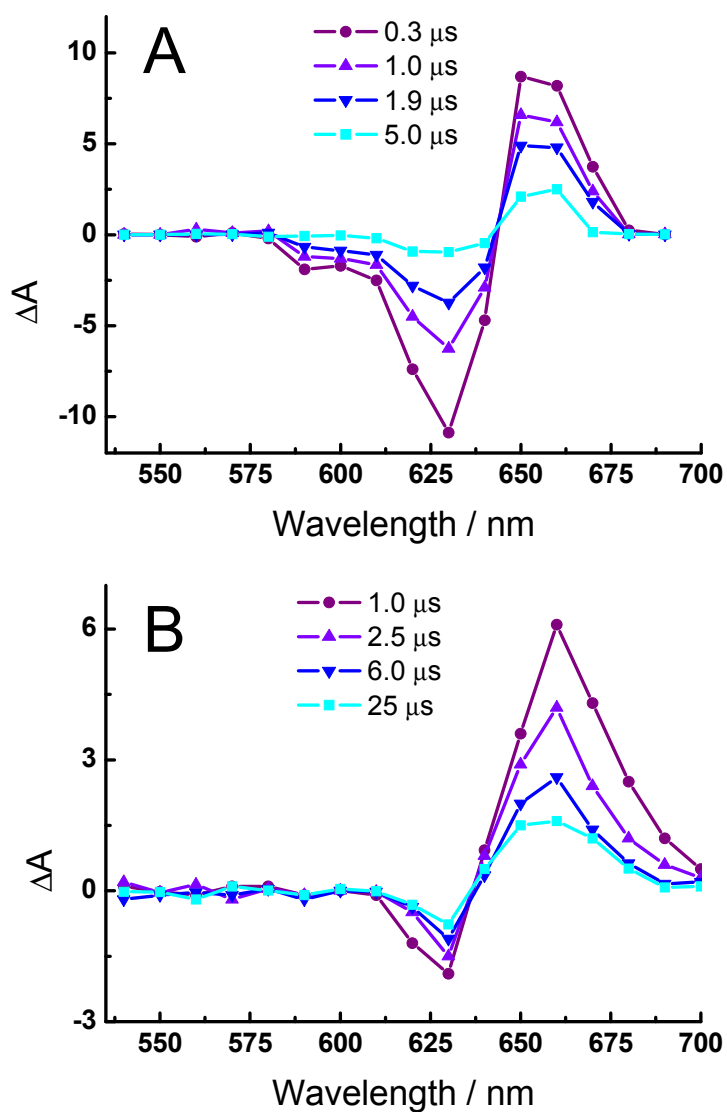

**Figure S4.** Change of the microsecond transient absorption spectra of SQ 41 in DCM (A) and in TAC (B) at four time delays after the laser pulse excitation (640 nm).

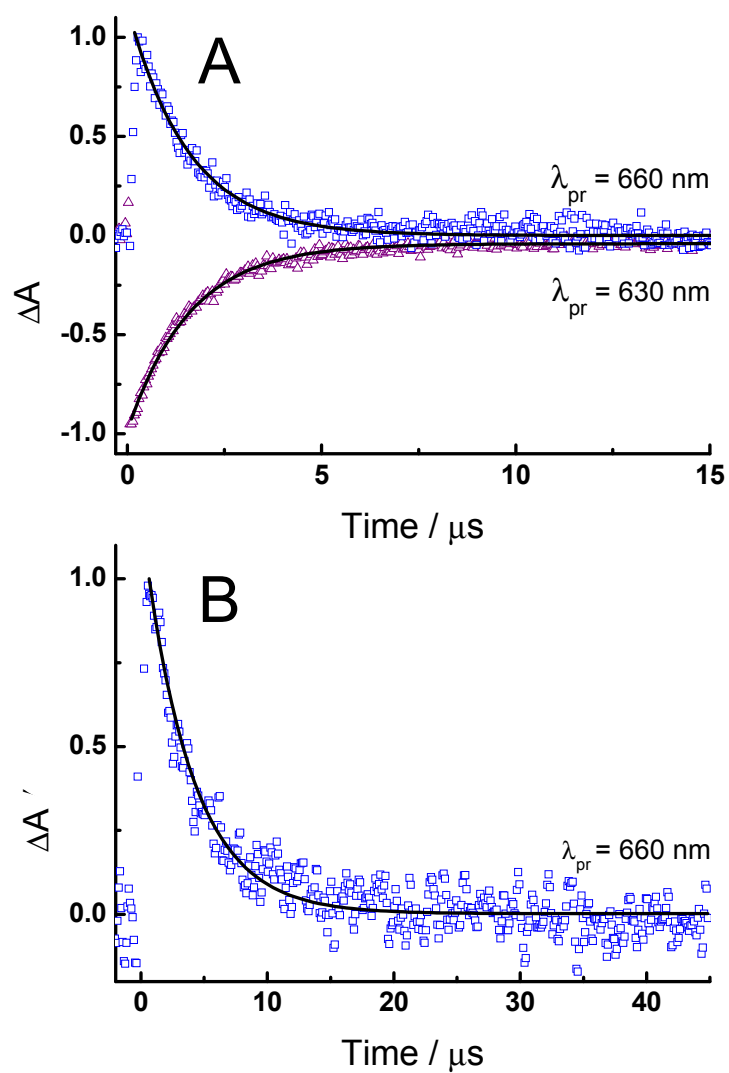

**Figure S5.** Microsecond time profiles of the variation in the normalized absorption intensity ( $\Delta A$ ) of SQ 41 in DCM (A) and in TAC (B) at 660 and 630 nm. The solid curves represent the best fits of the experimental data. Lifetimes of 1.6 and 4  $\mu\text{s}$  were obtained from the fits in DCM and TAC, respectively.

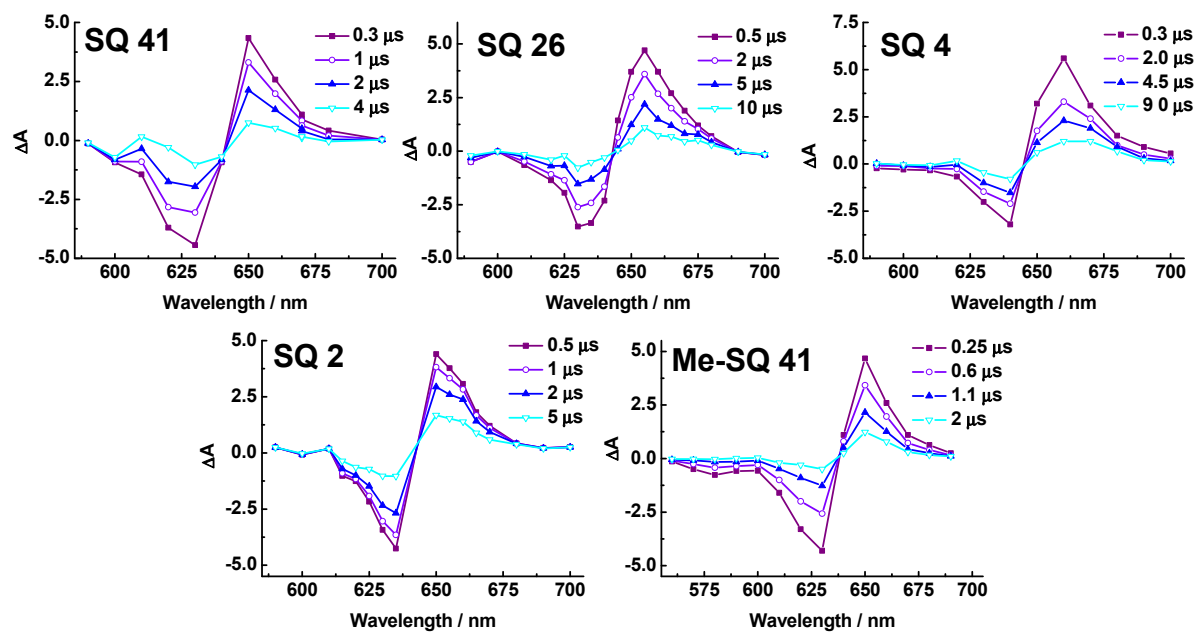

**Figure S6.** Microsecond transient visible absorption spectra of  $10^{-4}$  M of SQ 41, SQ 26, SQ 4, SQ 2 and Me-SQ 41 in MeOH at four time delays after the laser pulse excitation (640 nm).
